# Supplementary material for: Highly efficient visible light active Cu–ZnO/S-g-C3N4 nanocomposites for efficient photocatalytic degradation of organic pollutants
Source: Royal Society of Chemistry journal article supplement (doi:10.1039/d1ra07203j), 2021-01-01
Supplement: d1ra07203j1.pdf [file d1ra07203j1.pdf]

Supporting Information

**Highly efficient visible light active Cu-ZnO/S-g-C<sub>3</sub>N<sub>4</sub> nanocomposites for efficient photocatalytic degradation of organic pollutants**

Mohsin Javed<sup>1\*</sup>, Muhammad Azam Qamar<sup>1\*</sup>, Sammia Shahid<sup>1</sup>, Hashem O. Alsaab<sup>2</sup>, Salma Asif<sup>1</sup>

<sup>1</sup>Department of Chemistry, School of Science, University of Management and Technology, Lahore 54770, Pakistan.

<sup>2</sup>Department of Pharmaceutics and Pharmaceutical Technology, Taif University, P.O. Box 11099, Taif 21944, Saudi Arabia.

Corresponding authors.

E-mail addresses: mohsin.javed@umt.edu.pk (M. Javed), [qamariub@gmail.com](mailto:qamariub@gmail.com) (M. A. Qamar)

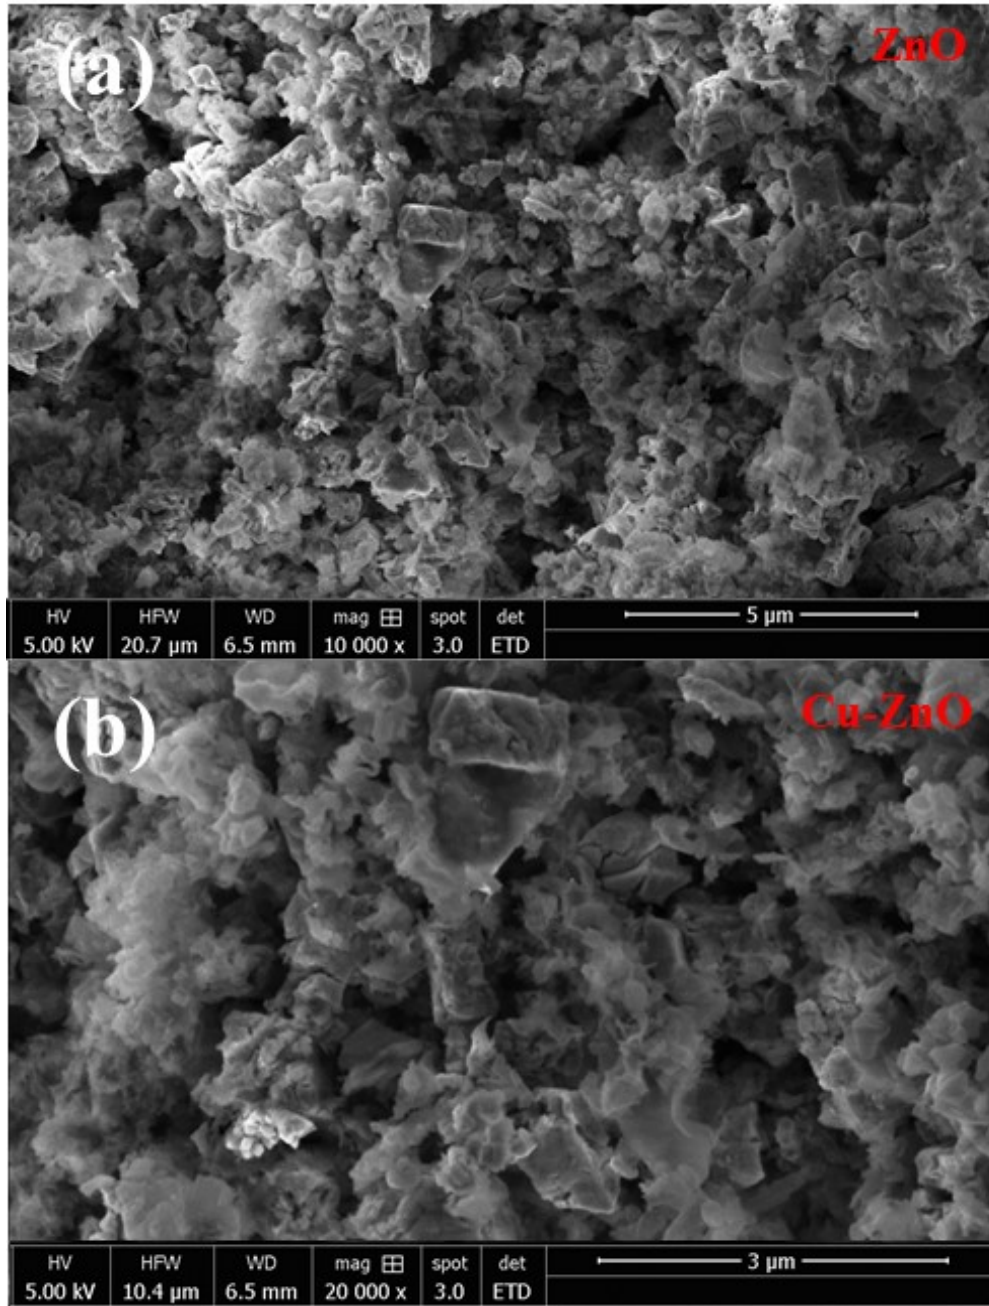

Fig. 1S SEM image of the ZnO (a) and 4-CZN (b) samples.
